# Supplementary material for: CXCR2 inhibition enables NASH-HCC immunotherapy
Source: HighWire-hosted journal article supplement (doi:10.1136/gutjnl-2021-326259), 2022-04-27
Supplement: gutjnl-2021-326259supp003_data_supplement.pdf [file gutjnl-2021-326259supp003_data_supplement.pdf]

Table 1

|              | Forward primer       | Reverse primer       |
|--------------|----------------------|----------------------|
| <i>Cybb</i>  | GATGATAGCACTGCACACCG | ATTCCTGTGATCCCAGCCAA |
| <i>Lcn2</i>  | AAGGTGGCAGAACGAGATGA | ACCGCATAGTAGTGAGTCCG |
| <i>Ltf</i>   | ACTGAATGGGTGGTGAGTGT | GGGAGTGCTGGCCAAATAAG |
| <i>Csf3r</i> | AAGACCCCAGGAGACCTTTG | GCCAGAGACAGAGACACACT |
| <i>Rsp27</i> | GACGTGAAATGCCCAGGATG | CTTTCAGTGCTGCTTCCTCC |
| <i>Jund</i>  | CACGCTCTGCCTTCCTTTT  | AAAGAGAGGGGATGGTGTGC |
